# Supplementary material for: From Occasional Choices to Inevitable Musts: A Computational Model of Nicotine Addiction
Source: Comput Intell Neurosci. 2012 Nov 20;2012:817485. doi: 10.1155/2012/817485 (PMC3508524; doi:10.1155/2012/817485)
Supplement: Supplementary file 1 — The simulation results given in the paper are obtained by the m-files for the model behavior and by XPPAUT codes for bifurcation diagrams. Both of these source codes are provided as supplementary material and can be downloaded from http://www.selinmetin.info/. [file 817485.f1.zip]

Archive with 5 entries (5 files):
- 817485.f1/actor_bagimlilik.m
- 817485.f1/f.m
- 817485.f1/nicotine2.ode
- 817485.f1/nicotine_addiction_icann3_yorum.m
- 817485.f1/n_s_c_oneri_2.m
